# Supplementary material for: A new technological approach in diagnostic pathology: mass spectrometry imaging-based metabolomics for biomarker detection in urachal cancer
Source: PubMed Central journal article supplement (PMC8367814; doi:10.1038/s41374-021-00612-7), 2021-05-21
Supplement: 41374_2021_612_MOESM1_ESM.pdf [file 41374_2021_612_MOESM1_ESM.pdf]

## Supplementary information

| Measured<br>m/z | Calculated<br>m/z | Sum formula                                     | Analyte   | Adduct              | Mass error<br>(ppm) |
|-----------------|-------------------|-------------------------------------------------|-----------|---------------------|---------------------|
| 115.0026        | 115.0037          | C <sub>4</sub> H <sub>4</sub> O <sub>4</sub>    | Fumarate  | [M-H] <sup>-</sup>  | -9.4                |
| 124.0064        | 124.0074          | C <sub>2</sub> H <sub>7</sub> NO <sub>3</sub> S | Taurine   | [M-H] <sup>-</sup>  | -7.7                |
| 134.0461        | 134.0472          | C <sub>5</sub> H <sub>5</sub> N <sub>5</sub>    | Adenine   | [M-H] <sup>-</sup>  | -8.2                |
| 136.0061        | -                 | -                                               | -         | -                   | -                   |
| 138.0221        | -                 | -                                               | -         | -                   | -                   |
| 146.0450        | 146.0459          | C <sub>5</sub> H <sub>9</sub> NO <sub>4</sub>   | Glutamate | [M-H] <sup>-</sup>  | -5.9                |
| 150.0413        | 150.0421          | C <sub>5</sub> H <sub>5</sub> N <sub>5</sub> O  | Guanine   | [M-H] <sup>-</sup>  | -5.3                |
| 159.9831        | 159.9841          | C <sub>2</sub> H <sub>7</sub> NO <sub>3</sub> S | Taurine   | [M+Cl] <sup>-</sup> | -6.3                |
| 161.9801        | -                 | -                                               | -         | -                   | -                   |
| 170.0231        | 170.0239          | C <sub>5</sub> H <sub>5</sub> N <sub>5</sub>    | Adenine   | [M+Cl] <sup>-</sup> | -4.7                |
| 172.0201        | -                 | -                                               | -         | -                   | -                   |
| 175.9881        | -                 | -                                               | -         | -                   | -                   |
| 186.0181        | 186.0188          | C <sub>5</sub> H <sub>5</sub> N <sub>5</sub> O  | Guanine   | [M+Cl] <sup>-</sup> | -3.8                |
| 192.0662        | -                 | -                                               | -         | -                   | -                   |
| 193.0352        | 193.0354          | C <sub>6</sub> H <sub>10</sub> O <sub>7</sub>   | -         | [M-H] <sup>-</sup>  | -1                  |
| 195.0506        | 195.0510          | C <sub>6</sub> H <sub>12</sub> O <sub>7</sub>   | -         | [M-H] <sup>-</sup>  | -2.1                |
| 197.0032        | -                 | -                                               | -         | -                   | -                   |
| 207.9972        | -                 | -                                               | -         | -                   | -                   |
| 212.9722        | -                 | -                                               | -         | -                   | -                   |
| 214.9692        | -                 | -                                               | -         | -                   | -                   |
| 221.9952        | -                 | -                                               | -         | -                   | -                   |
| 232.0829        | -                 | -                                               | -         | -                   | -                   |

|          |          |                                                   |                                 |                     |      |
|----------|----------|---------------------------------------------------|---------------------------------|---------------------|------|
| 238.0485 | 238.0488 | C <sub>8</sub> H <sub>13</sub> NO <sub>5</sub>    | N-acetyl-L-2-aminoadipate       | [M+Cl] <sup>-</sup> | -1.1 |
| 263.0963 | -        | -                                                 | -                               | -                   | -    |
| 282.0753 | -        | -                                                 | -                               | -                   | -    |
| 419.2569 | 419.2569 | C <sub>21</sub> H <sub>41</sub> O <sub>6</sub> P  | Cyclic Phosphatidic acid (18:0) | [M-H] <sup>-</sup>  | 0    |
| 885.5495 | 885.5498 | C <sub>47</sub> H <sub>83</sub> O <sub>13</sub> P | Phosphatidylinositol (38:4)     | [M-H] <sup>-</sup>  | -0.3 |
